# Supplementary material for: Multicolor lifetime imaging and its application to HIV-1 uptake
Source: Springer Nature journal article supplement (doi:10.1038/s41467-023-40731-x), 2023-08-17
Supplement: MOESM1 [file 41467_2023_40731_MOESM1_ESM.pdf]

## Supplementary information for

### Multicolor Lifetime Imaging and its Application to HIV-1 Uptake

Tobias Starling<sup>1</sup>, Irene Carlon-Andres<sup>1</sup>, Maro Iliopoulou<sup>2,3</sup>, Benedikt Kraemer<sup>4</sup>, Maria Loidolt-Krueger<sup>4</sup>, David J. Williamson<sup>1</sup>, Sergi Padilla-Parra<sup>1,2,5\*</sup>

<sup>1</sup>*Department of Infectious Diseases, King's College London, Faculty of Life Sciences & Medicine, London, United Kingdom.*

<sup>2</sup>*Division of Structural Biology, Wellcome Centre for Human Genetics, University of Oxford. Oxford, United Kingdom*

<sup>3</sup>*Current Address: <sup>2</sup>Randall Division of Cell and Molecular Biophysics and Department of Physics, King's College London, London, United Kingdom.*

<sup>4</sup>*PicoQuant GmbH, Rudower Chaussee 29 (IGZ), 12489, Berlin, Germany.*

<sup>5</sup>*Randall Division of Cell and Molecular Biophysics, King's College London, London, United Kingdom.*

\* Correspondence: [sergio.padilla\\_parra@kcl.ac.uk](mailto:sergio.padilla_parra@kcl.ac.uk)

a

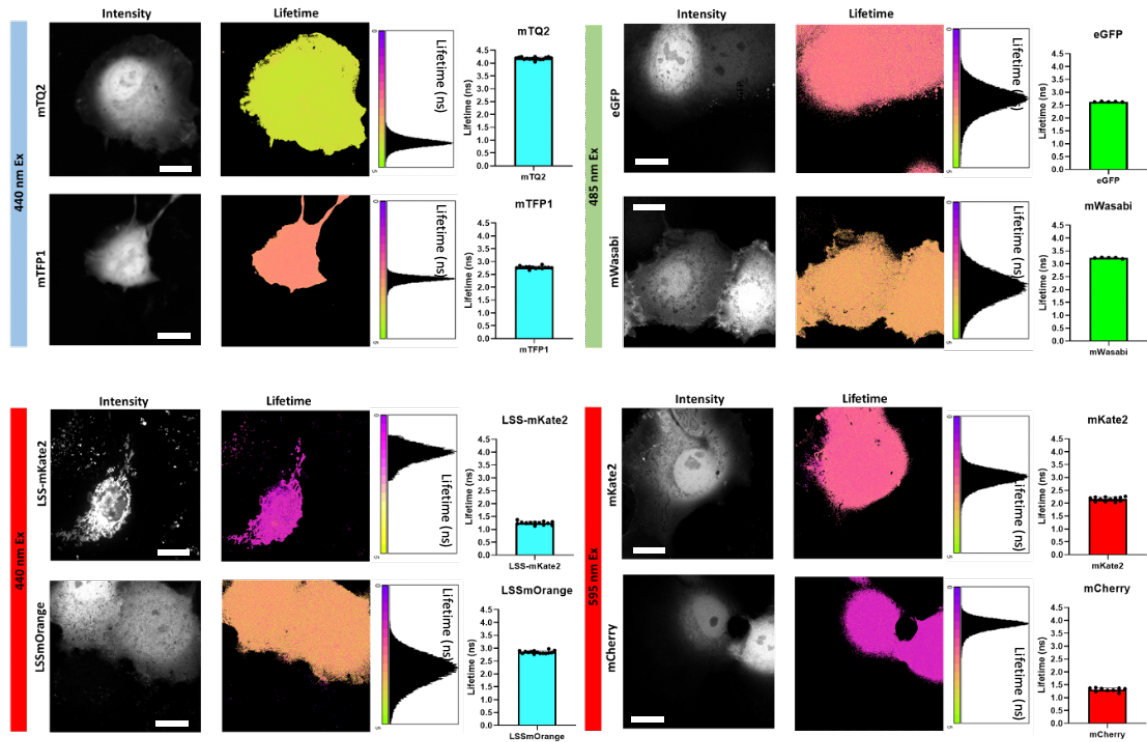

b

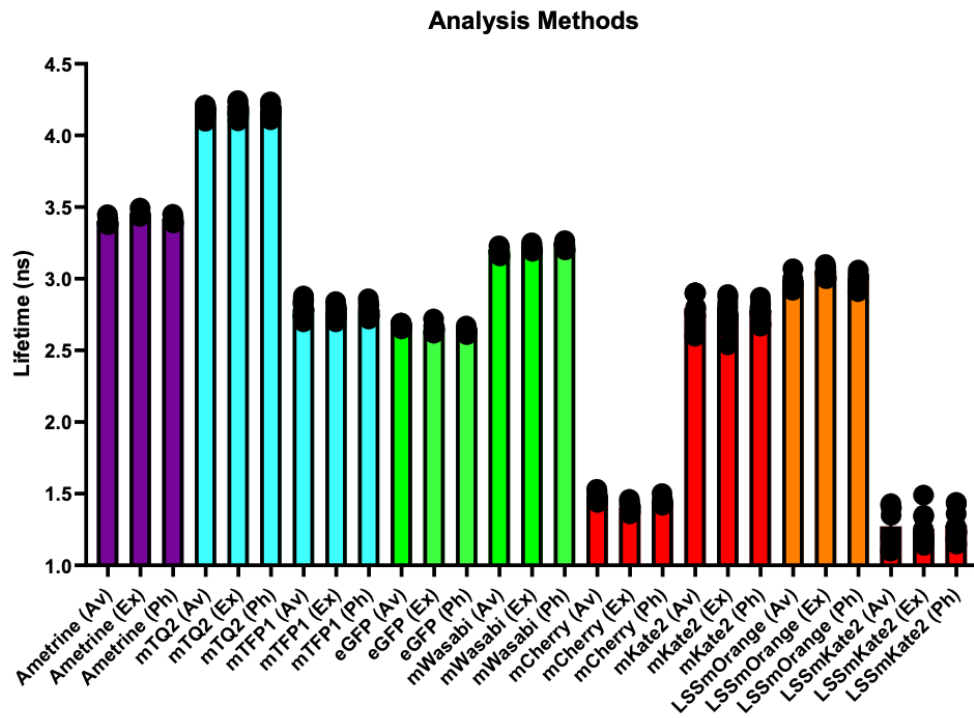

**Supplementary Figure 1. Fluorescent Lifetime determination for each fluorescent protein when expressed in live cells at physiological conditions. (a)**

A sample of eight different live cells expressing one fluorescent protein species are depicted. Intensity micrographs (Left row) are depicted together with lifetime images (right micrograph) pixel lifetime histograms and bar charts for the average lifetime of each specific fluorescent protein. The lifetimes in each bar chart are: for mTQ2 ( $4.2 \pm 0.1$  ns,  $n = 15$ ), for mTFP1 ( $2.8 \pm 0.1$  ns,  $n = 14$ ), for eGFP ( $2.6 \pm 0.0$  ns,  $n = 5$ ), for mWasabi ( $3.2 \pm 0.01$  ns,  $n = 5$ ), for mito-LSSmKate2 ( $1.2 \pm 0.1$  ns,  $n = 12$ ), for LSSmOrange ( $2.8 \pm 0.1$  ns,  $n = 15$ ), for mKate2 ( $2.2 \pm 0.1$  ns,  $n = 12$ ) and for mCherry ( $1.3 \pm 0.1$  ns,  $n = 9$ ).  $n$  denotes number of viruses examined over 3 independent experiments. The blue, green and red channels are shown. Scale bar 5  $\mu$ m. Cells expressing Mito-LSSmKate2 were tested for lifetime measurement and expression, the other cells were expressing the corresponding fluorescent proteins freely diffusing in the cytosol. (b) Bar diagram showing the calculation of lifetimes for the nine fluorescent proteins chosen for multicolor FLIM employing the average lifetime (AV), the fitting approach (EX) and the Phasor Plot (Ph). The values for each fluorescent protein employing the three approaches were: for Ametrine ( $3.4 \pm 0.0$  ns,  $n = 5$  (Average Lifetime),  $3.45 \pm 0.0$  ns,  $n = 5$  (Exponential fit) and  $3.4 \pm 0.0$  ns,  $n = 5$  (Phasor)) for mTQ2 ( $4.2 \pm 0.0$  ns,  $n = 15$  (Average Lifetime),  $4.2 \pm 0.0$  ns,  $n = 15$  (Exponential fit) and  $4.2 \pm 0.0$  ns,  $n = 15$  (Phasor)) for mTFP1 ( $2.8 \pm 0.0$  ns,  $n = 12$  (Average Lifetime),  $2.8 \pm 0.0$  ns,  $n = 12$  (Exponential fit) and  $2.8 \pm 0.0$  ns,  $n = 12$  (Phasor)) for eGFP ( $2.7 \pm 0.0$  ns,  $n = 15$  (Average Lifetime),  $2.7 \pm 0.0$  ns,  $n = 15$  (Exponential fit) and  $2.7 \pm 0.0$  ns,  $n = 15$  (Phasor)) for mWasabi ( $3.2 \pm 0.0$  ns,  $n = 5$  (Average Lifetime),  $3.2 \pm 0.0$  ns,  $n = 5$  (Exponential fit) and  $3.2 \pm 0.0$  ns,  $n = 5$  (Phasor)) for mCherry ( $1.5 \pm 0.0$  ns,  $n = 10$  (Average Lifetime),  $1.4 \pm 0.0$  ns,  $n = 10$  (Exponential fit) and  $1.4 \pm 0.0$  ns,  $n = 10$  (Phasor)), for mKate2 ( $2.8 \pm 0.0$  ns,  $n = 13$  (Average Lifetime),  $2.8 \pm 0.0$  ns,  $n = 13$  (Exponential fit) and  $2.8 \pm 0.0$  ns,  $n = 13$  (Phasor)), for LSSmOrange ( $3.0 \pm 0.0$  ns,  $n = 5$  (Average Lifetime),  $3.1 \pm 0.0$  ns,  $n = 5$  (Exponential fit) and  $3.0 \pm 0.0$  ns,  $n = 5$  (Phasor)) and for LSSmKate2 ( $1.3 \pm 0.0$  ns,  $n = 9$  (Average Lifetime),  $1.3 \pm 0.0$  ns,  $n = 9$  (Exponential fit) and  $1.3 \pm 0.0$  ns,  $n = 9$  (Phasor)).  $n$  denotes number of viruses examined over 3 independent experiments. Data are presented as mean values  $\pm$  SD as appropriate. Source data are provided with this paper.

**a**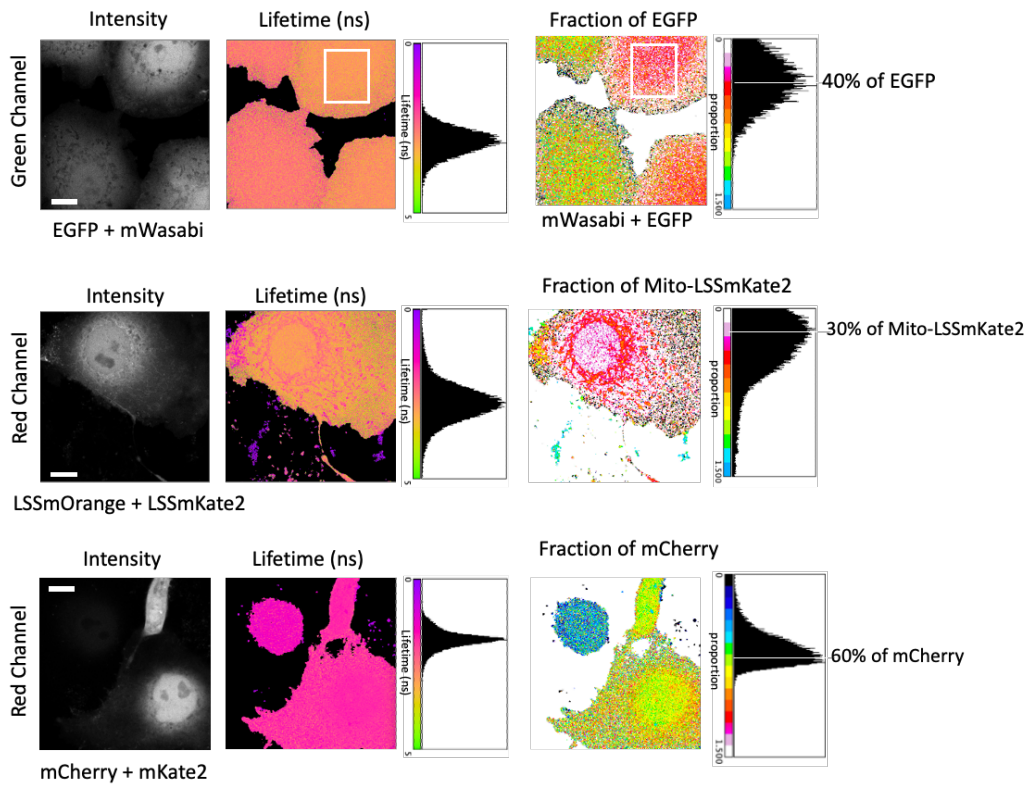**b**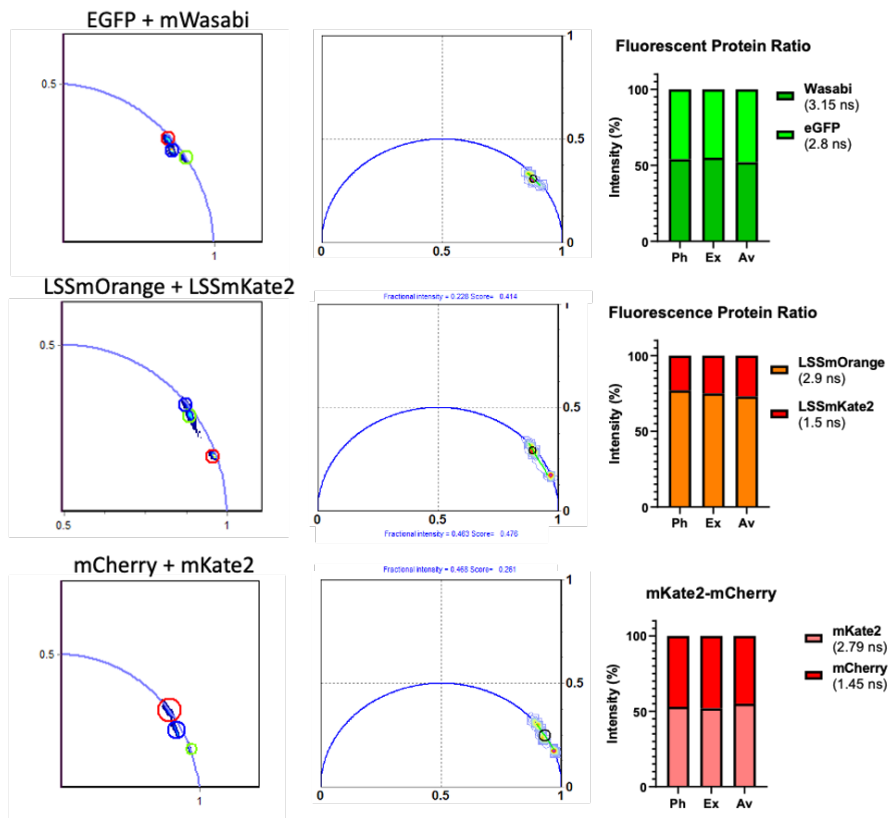

**Supplementary Figure 2. Single pixel pairwise color separation for each channel.** Non-fitting analytical solution as described in Methods is demonstrated for green and red channels. Intensity images of cells co-expressing either EGFP and mWasabi (green channel), LSSmOrange and LSS-mKate2 (red channel) and mCherry and mKate2 (red channel) are shown for both, the average lifetime approach (in nanoseconds, ns) (a) and the phasor analysis (b). Lifetime images (middle micrographs), pixel histograms and the calculated fraction of fluorescent protein pixel-by-pixel (right micrographs) are also shown in the second and third rows. Scale bar 2  $\mu\text{m}$ . (b) The Phasor Plot and the calculation of the proportion of each species are shown in the first and second columns for the three couples (EGFP + mWasabi, LSSmOrange + LSSmKate2 and mCherry + mKate2). The third row shows the corresponding bar diagrams for the calculation of proportions employing the Phasor (Ph), the fitting approach (Ex) and the average lifetime (Av). Source data are provided with this paper.

a

Atto 488

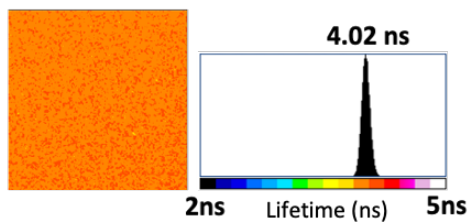

Atto 594

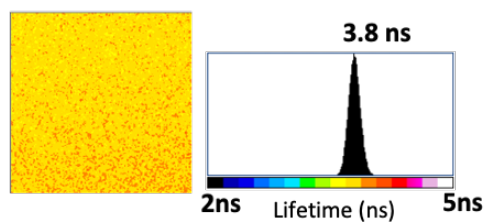

Atto594 + Atto488 ( $\Delta$ Lifetime = 0.2 ns)

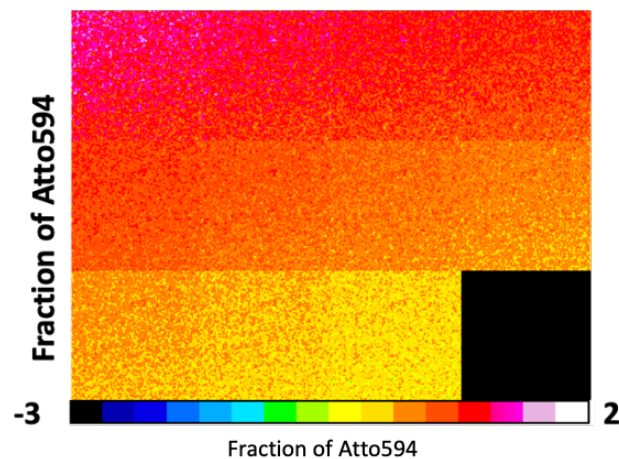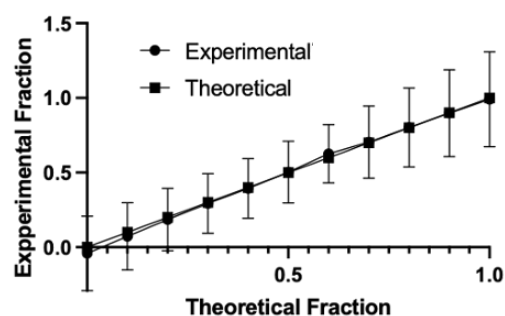

b

Atto 488

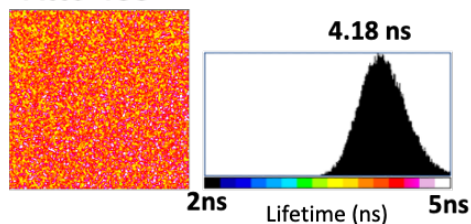

Atto 647N

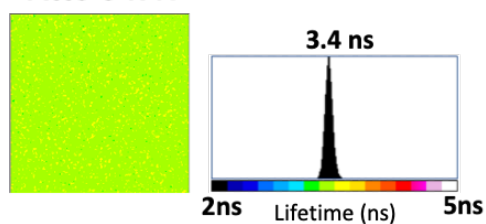

Atto647N + Atto488 ( $\Delta$ Lifetime = 0.7 ns) + Extra Noise

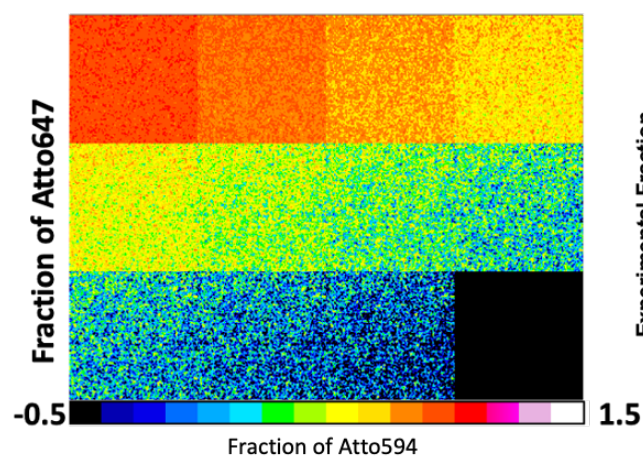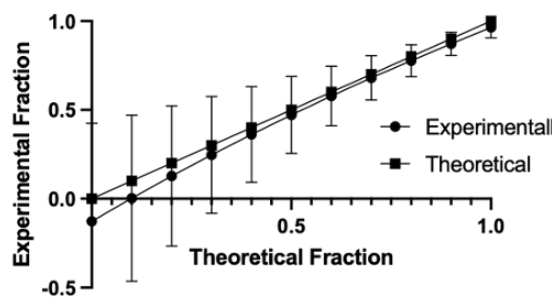

**Supplementary Figure 3. Mixing of ideal two species solutions to evaluate the error of the average lifetime unmixing approach.** Two fluorophores with close and known lifetimes Atto488 and Atto594 (4 nanoseconds (ns) and 3.8 ns) were mixed with known proportions to evaluate the error of the unmixing approach developed in material and methods. For each solution the right panel shows the ideal result (theoretical, squares) and the calculated one (experimental, circles). (b) The addition of noise in the acquisition of Atto488 when mixed with Atto647N was also evaluated. Although the difference in lifetime of these two fluorophores is bigger than in (a) (0.6 ns) the addition of noise has a bigger impact in the calculation of each proportion (right panel). Each value in the graph corresponds to a single image and the error provided to the standard deviation across all pixels of the corresponding image with known proportions of Atto488 and Atto594 (a) or Atto488 and Atto647N. Source data are provided with this paper.

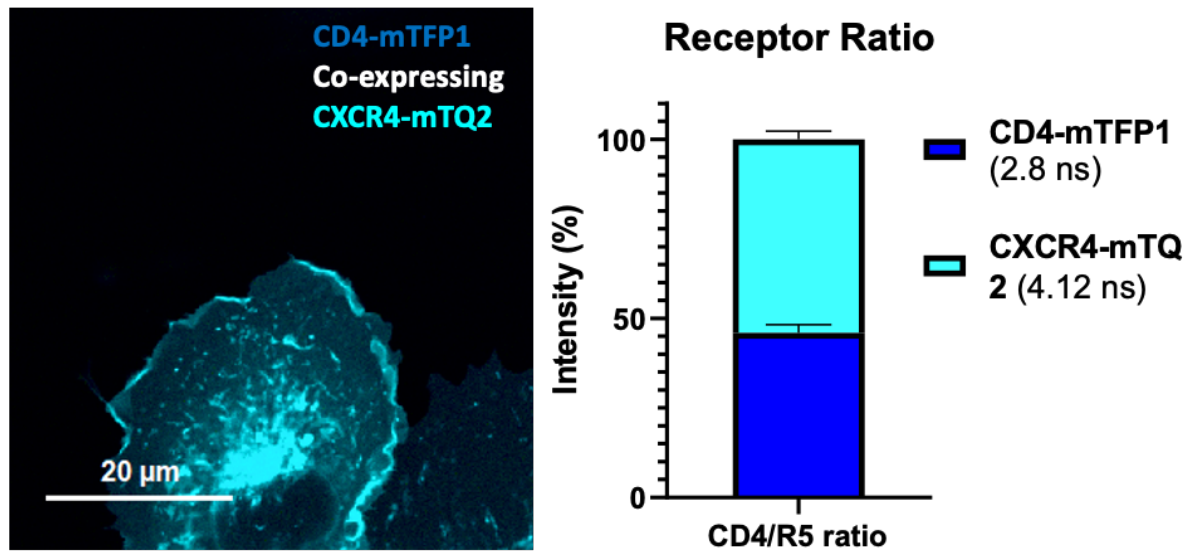

**Supplementary Figure 4. Cells co-expressing CD4-mTFP1 and CXCR4-mTQ2 not engaged in the virological synapse.** Live cells co-expressing CD4-mTFP1 and CXCR4-mTQ2 were analyzed to check for the overall proportion of these receptors in normal conditions. Left panel, cell co-expressing CD4-mTFP1 (dark blue) and CXCR4-mTQ2 (cyan). Right panel, a bar graph showing the proportion of expression of CD4-mTFP1 (lifetime fixed at 2.8 nanoseconds (ns)) and CXCR4-mTQ2 (lifetime fixed at 4.12ns). The bar shows an average proportion of CD4-mTFP1 of  $45.9 \pm 2.3$   $n = 7$  and CXCR4-mTQ2 of  $54.1 \pm 2.3$   $n = 7$ .  $n$  denotes number of viruses examined over 3 independent experiments. Data are presented as mean values  $\pm$  SD as appropriate. Source data are provided with this paper.



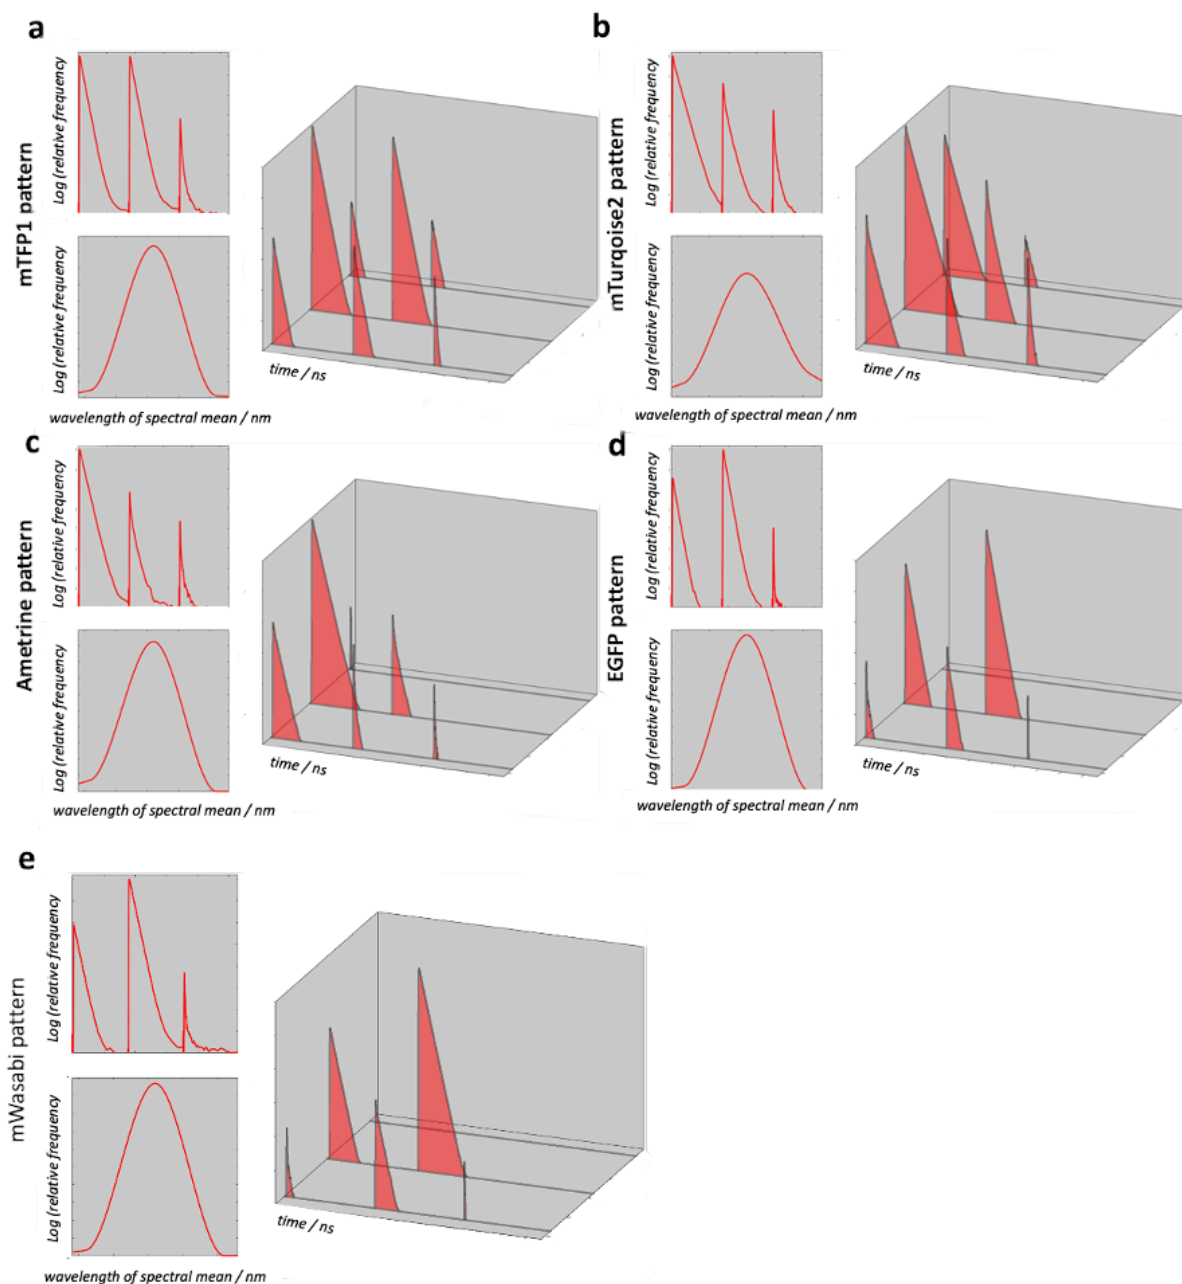

**Supplementary Figure 5. Pattern Matching profiles for blue and green fluorescent proteins.** The pattern matching profiles for cells expressing mTFP1 (a), mTQ2 (b), Ametrine (c), EGFP (d) and mWasabi (e) were calculated for three pulsed interleaved excitation employing three detectors with the same settings as in multicolor FLIM acquisition. The abbreviation ns denotes nanoseconds.

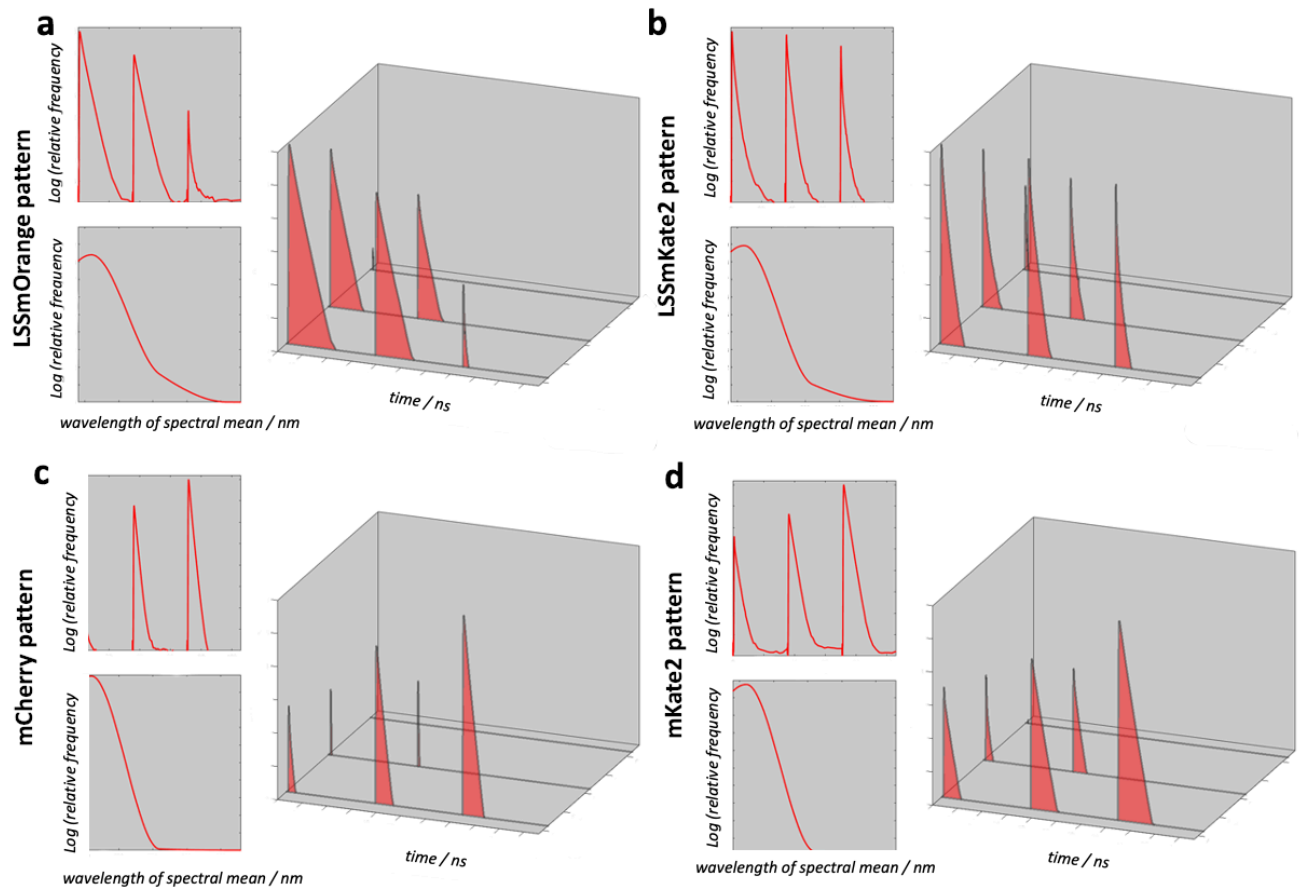

**Supplementary Figure 6. Pattern Matching profiles for orange and red fluorescent proteins.** The pattern matching profiles for cells expressing LSSmOrange (a), LSSmKate2 (b), mCherry (c) and mKate2 (d) were calculated for three pulsed interleaved excitation employing three detectors with the same settings as in multicolor FLIM acquisition. The abbreviation ns denotes nanoseconds.

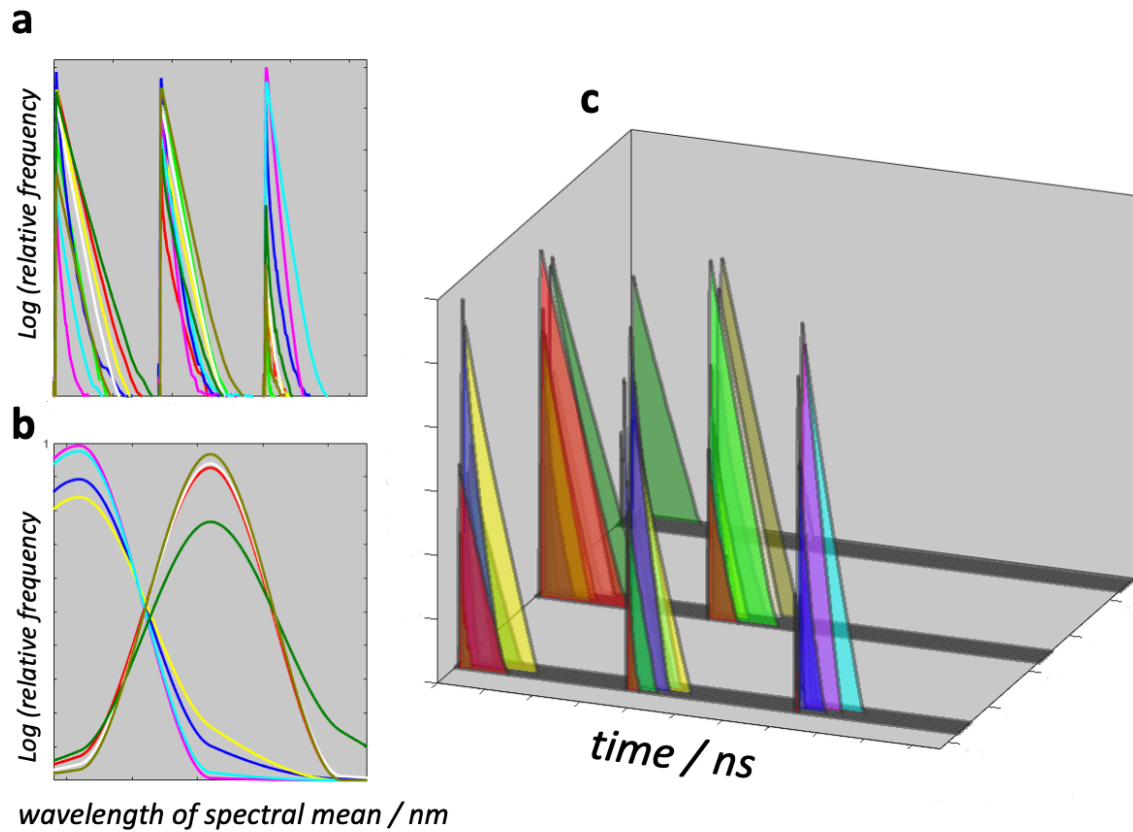

**Supplementary Figure 7. Pattern Matching profiles for all fluorescent proteins.** The pattern matching profiles for all cells expressing mTFP1, mTQ2, Ametrine, EGFP, mWasabi LSSmOrange, LSSmKate2, mCherry and mKate2 were calculated for three pulsed interleaved excitation employing three detectors with the same settings as in multicolor FLIM acquisition. The different decay patterns are shown in panel (a) together with the spectral profile (panel b) and the decay pattern as they were detected for each of the three channels (panel c); where each of the three detectors are shown in the z axis noted with three parallel black bold lines. The abbreviation ns denotes nanoseconds.

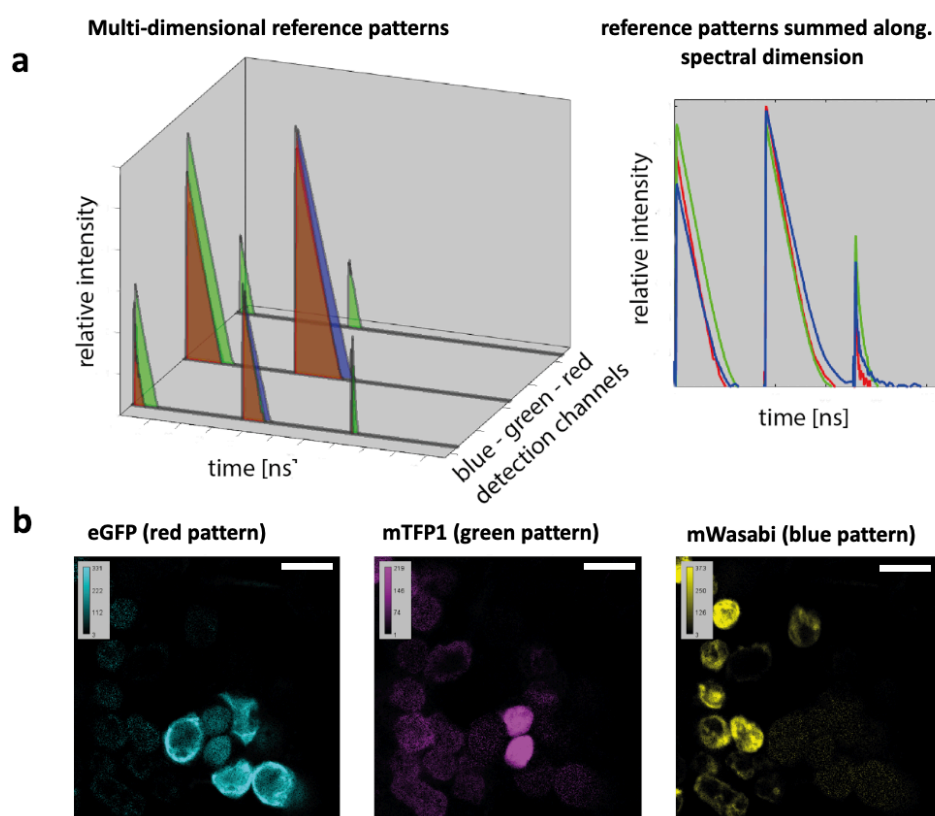

**Supplementary Figure 8. Pattern Matching profiles for eGFP, mTFP1 and mWasabi.** (a) Crosstalk signature between eGFP, mTFP1 and mWasabi (spectral, top panels) and pixel by pixel (bottom panels) result of applying pattern matching for these three fluorescent proteins (b): eGFP (cyan micrograph), mTFP1 (purple micrograph) and mWasabi (yellow micrograph). Scale bar 5  $\mu\text{m}$ .

Quadruple labelled virus (t = 90 min)

U2OS cells

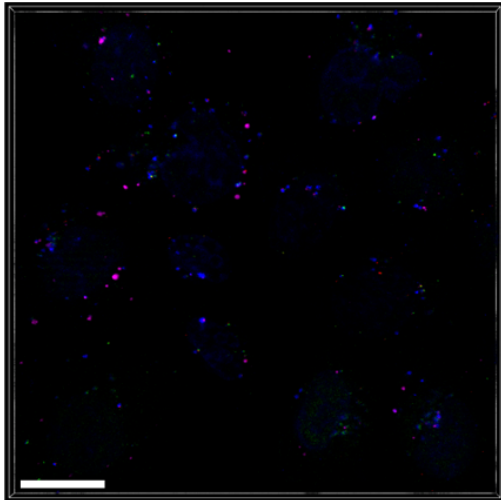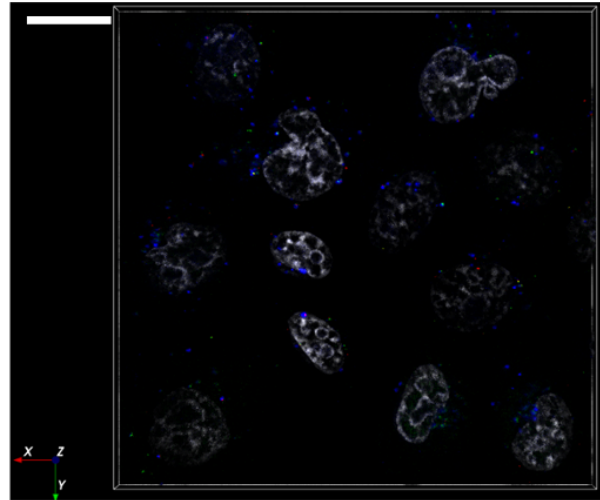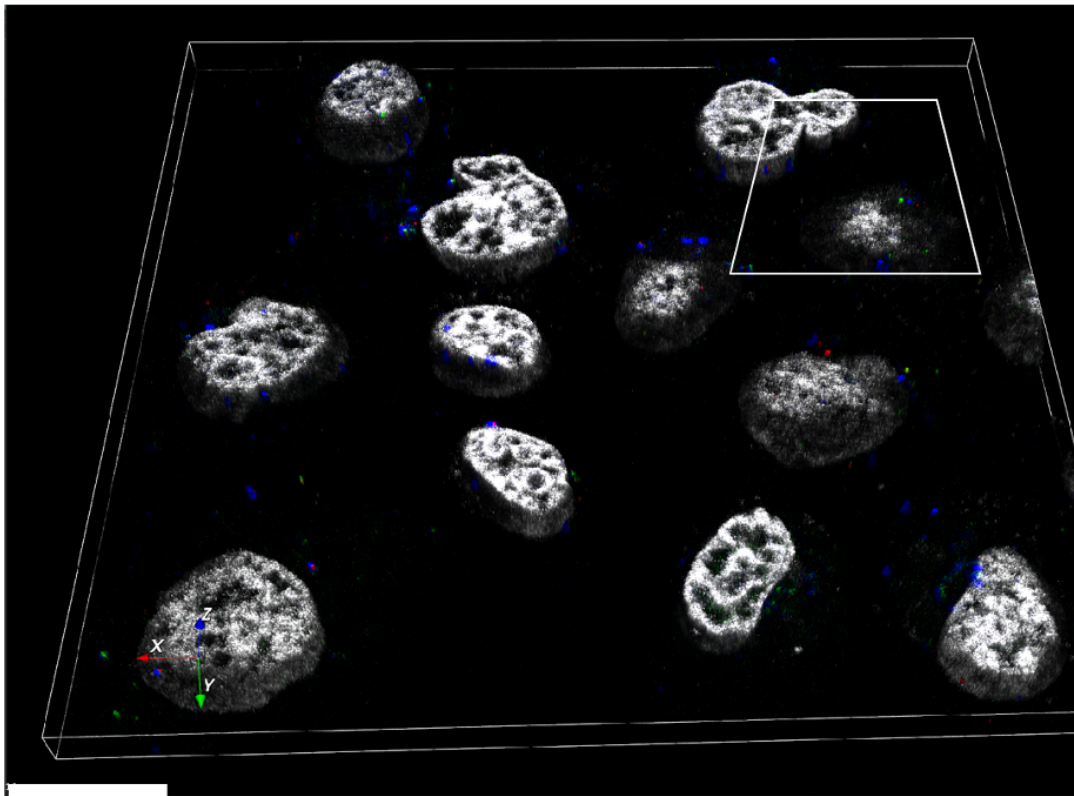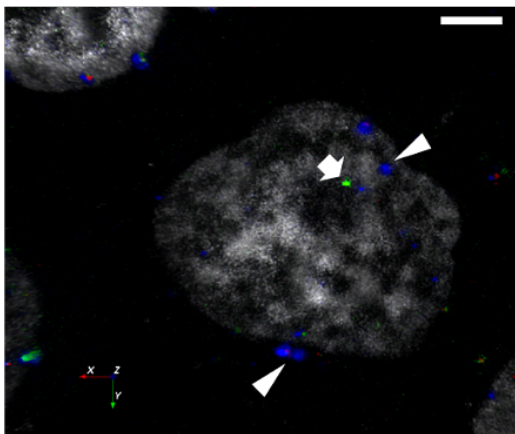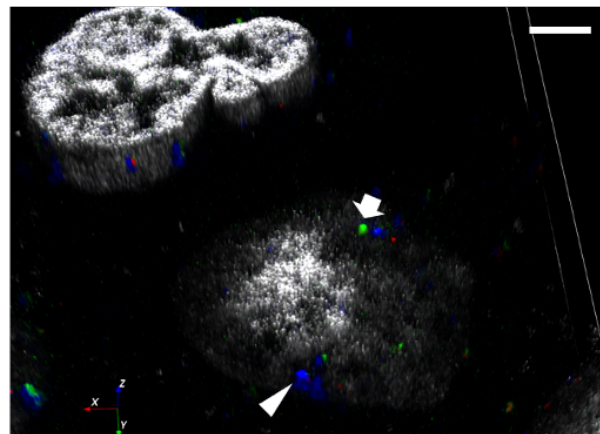

**Supplementary Figure 9. Three dimensional confocal imaging of quadruple viruses exposed to U2OS.** (a) U2OS cells were exposed to quadruple labeled viruses, stained in the nucleus with DAPI and imaged at ( $t = 90$  min). Merged images coming from 6 different channels are depicted: (transmission, grey, DAPI blue, Gag-mCherry red, CA-GFP green, Vpr-mTQ2, cyan and DiD, yellow) with and without DAPI (top panels). A three-dimensional representation is shown including the DAPI channel (grey color, middle panel). The white square is zoomed to point at sub-viral particles within the nucleus (white arrows point at CA-eGFP, green dots) and triangles point at Vpr-mTQ2, blue dots). These particles were only seen at  $t = 90$  min (bottom panels). Scale bar  $2\ \mu\text{m}$

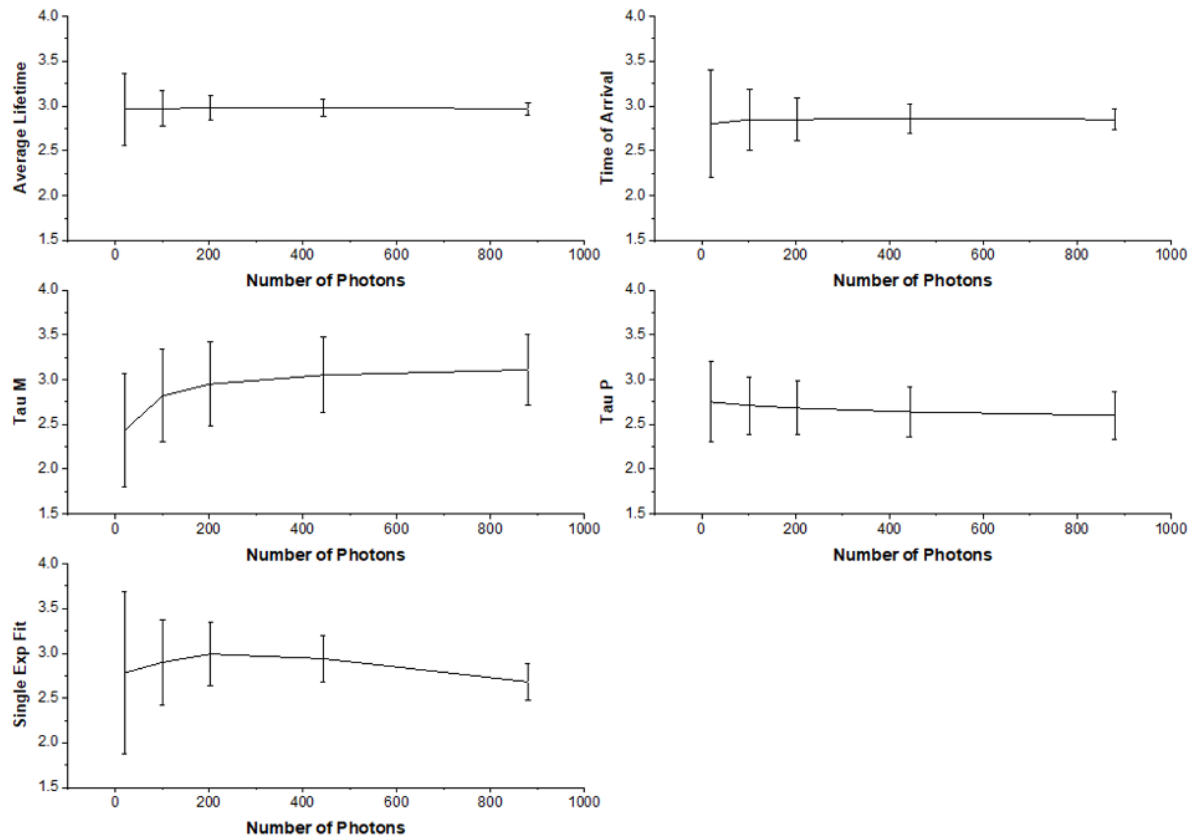

**Supplementary Figure 10. Impact of the number of photons on lifetime calculation in live cells.** Different lifetime analyses were tested comprising both non-fitting (top panels), phasor (middle panels) and fitting (bottom left panel) approaches. The calculation of both the average lifetime and the photon arrival time are very stable until 20-50 photons per pixel; where the lifetimes are still reliable, but their error (standard deviation) starts to increase. Single exponential approaches turned out to be much dependent on the photon budget. All calculations were made with the same sample consisting on a TZM-bl cell expressing CD4-mTFP1 alone. The data was calculated with single stack of images where the number of images within the stack was varied to impact the number of photons and the different lifetime calculations. Data are presented as mean values  $\pm$  SD” as appropriate. The abbreviations Tau M (tau modulation), Tau P (tau phase) and Single Exp Fit (single exponential fit). Source data are provided with this paper.



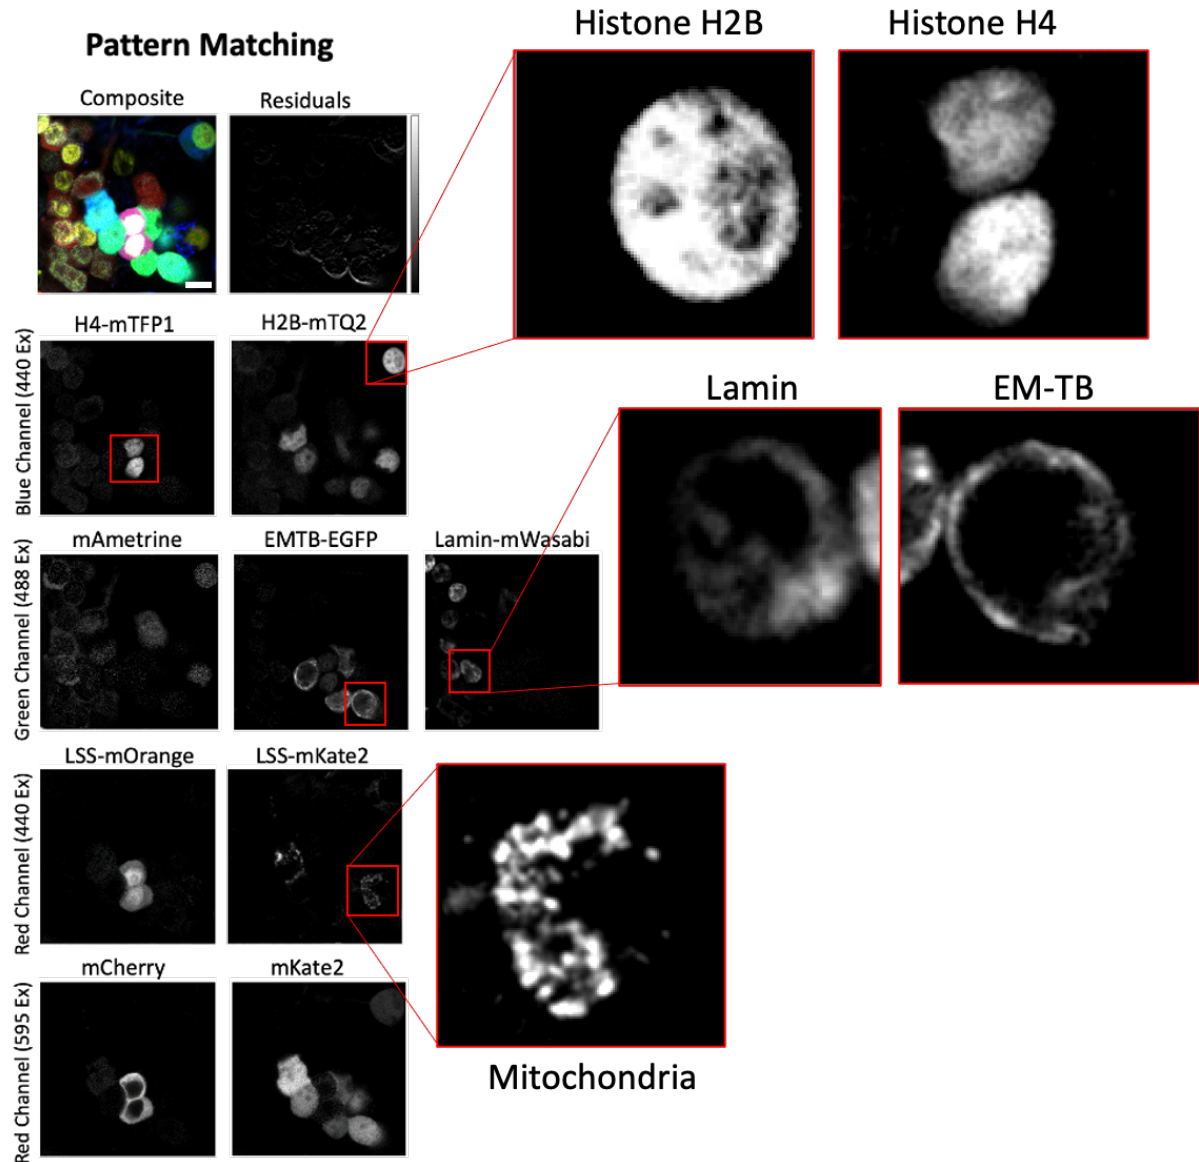

**Supplementary Figure 11. Zoom ins of individual cells showing characteristics of the different sub-cellular structures.** Zoomed in regions of interest (square regions) from Figure 4 are shown to highlight the sub-cellular structures resolved by pattern matching. Both histones show chromatin patterns (top panels). The tubulin (EM-TB) is also highlighted showing cables around the cytosol of HEK293T cells. Lamin is localized around the nucleus and finally the granular pattern for mitochondria are also shown (bottom panels). Scale bar. 10  $\mu\text{m}$ . Abbreviation “Ex” denotes excitation.



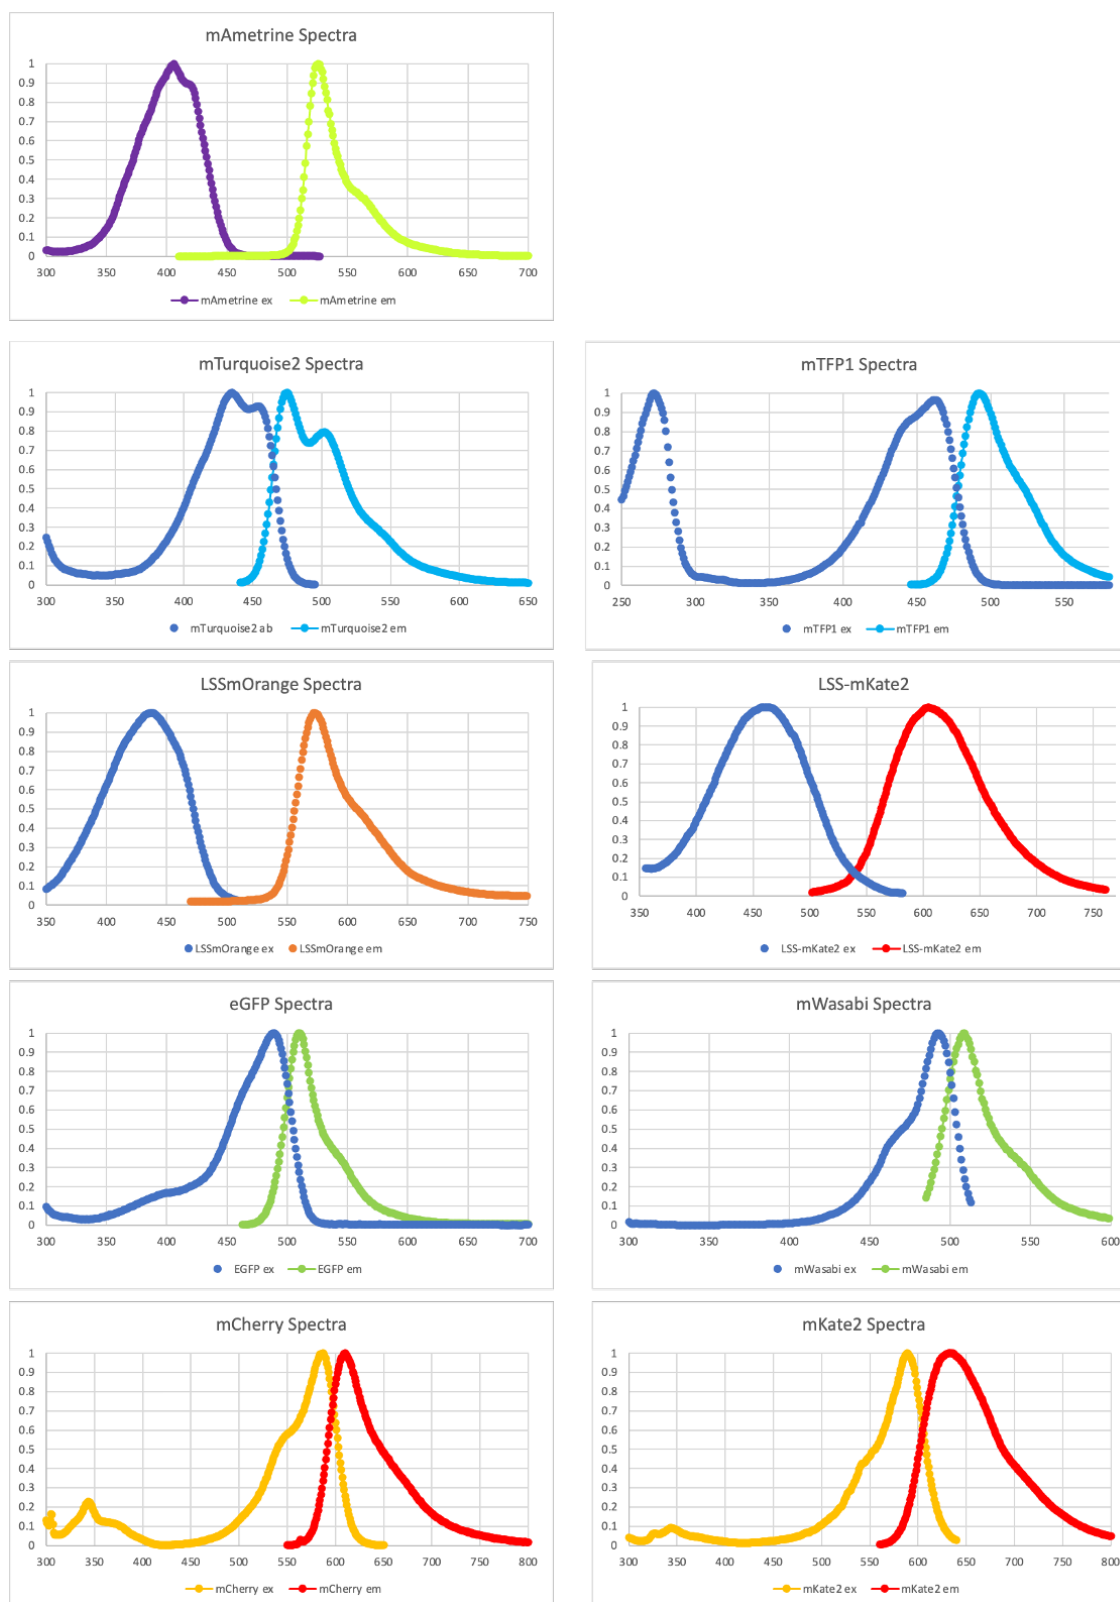

**Supplementary Figure 12. Excitation and emission spectra for the 9 fluorescent proteins chosen for simultaneous multicolor FLIM.** The normalized excitation spectra are shown for the nine fluorescent proteins chosen to simultaneously acquire nine colors in the multicolor FLIM approach

**Supplementary Table 1.** Spectral properties for individual fluorescent proteins tested when expressed in live cells.

| Fluorescent Protein | Excitation (nm) | Emission (nm) | EC      | QY   | Brightness | pKa | Lifetime (in vitro) ns | Lifetime (COS7 cells at Room T) ns | Lifetime (COS7 cells at 37 °C) ns | Lifetime HEK293T ns (if different) | Reference (Source)                             |
|---------------------|-----------------|---------------|---------|------|------------|-----|------------------------|------------------------------------|-----------------------------------|------------------------------------|------------------------------------------------|
| Ametrine            | 406             | 526           | 45,000  | 0.58 | 26.1       | 6   | N/A                    | 3.5                                | 3.5                               | 3.5                                | Addgene #54505                                 |
| mTQ2                | 434             | 474           | 30,000  | 0.93 | 27.9       | 3.1 | 4                      | 3.7                                | 4.12                              | 4.12                               | Addgene #54842                                 |
| mCerulean           | 433             | 475           | 33,000  | 0.49 | 16.7       | N/A | N/A                    | 3                                  | 3                                 | 3                                  | Addgene #27795                                 |
| eCFP                | 434             | 477           | 32,500  | 0.4  | 13         | 4.7 | 3                      | 2.4                                | 2.4                               | 2.4                                | Tramier et al., 2006 MRT                       |
| SSmOrange           | 437             | 572           | 52,000  | 0.45 | 23.4       | 5.7 | 2.75                   |                                    | 3.4                               | 2.9                                | Addgene #37130                                 |
| SS-mKate2           | 460             | 605           | 26,000  | 0.17 | 4.42       | 2.7 | 1.4                    | 1.5                                | 1.5                               | 1.4                                | Addgene #54795                                 |
| mTFP1               | 462             | 492           | 64,000  | 0.85 | 54.4       | 4.3 | 3.2                    | 2.9                                | 2.8                               | 2.7                                | Addgene #54521 and Padilla-Parra et al., 2009  |
| NowGFP              | 494             | 502           | 56,700  | 0.76 | 43.09      | 6.2 | 5.1                    | 4                                  | 4                                 | 4                                  | Addgene #74749 and Toby/Dave                   |
| BrusLee             | 487             | 509           | 86,000  | 0.3  | 25.8       | N/A | 0.82                   |                                    |                                   |                                    | Mamontova et al., 2018 Scientific Rep          |
| eGFP                | 488             | 507           | 55,900  | 0.6  | 33.54      | 6   | 2.6                    | 2.69                               | 2.7                               | 2.7                                | Addgene #176015 and Padilla-Parra et al., 2009 |
| mNeonGreen          | 506             | 517           | 116,000 | 0.8  | 92.8       | 5.7 | 3.1                    | 3                                  | 3                                 | 3                                  | From Addgene #98886                            |
| mClover3            | 506             | 518           | 109,000 | 0.78 | 85.02      | N/A |                        | 3.2                                | 3.2                               | 3.2                                | Addgene #74236                                 |
| FASTlime            | 481             | 540           | 45,000  | 0.23 | N/A        |     |                        | 1.8                                | 1.8                               | 1.8                                | Plamont et al., 2015 (PNAS)                    |
| FAST citrus         | 480             | 541           | 41,000  | 0.23 | N/A        |     |                        | 2.8                                | 2.8                               | 2.8                                | Plamont et al., 2015 (PNAS)                    |
| FASTamber           | 499             | 562           | 45,000  | 0.49 | N/A        |     |                        | 3                                  | 3                                 | 3                                  | Plamont et al., 2015 (PNAS)                    |
| FASTcoral           | 518             | 600           | 39,000  | 0.31 | N/A        |     |                        | 3                                  | 3                                 | 3                                  | Plamont et al., 2015 (PNAS)                    |
| mHoneyDew           | 487             | 562           | 17,000  | 0.12 | 2.04       | 4   |                        | 1.8                                | 1.8                               | 1.8                                | Addgene #91760                                 |
| cyRFP               | 529             | 588           | 48,000  | 0.76 |            |     |                        | 3.4                                | 3.4                               | 3.4                                | Addgene #84354                                 |
| sfGFP               | 485             | 510           | 83,300  | 0.65 |            |     |                        | 2.68                               | 2.68                              | 2.68                               | Addgene #54579                                 |
| mWassabi            | 493             | 509           | 70,000  | 0.8  | 56         | 6.5 |                        | 3.1                                | 3.1                               | 3.1                                | Addgene #54743                                 |
| mScarlett           | 569             | 594           | 100,000 | 0.7  | 70         | 5.3 | 3.9                    | 3.5                                | 3.4                               | 3.4                                | Addgene #85042                                 |
| mScarlet-H          | 551             | 592           | 74,000  | 0.2  | 14.8       |     | 1.3                    | 1.4                                | 1.3                               |                                    | Addgene #85043                                 |
| tdTomato            | 554             | 581           | 138,000 | 0.69 | 95.22      | 4.7 | N/A                    | 2.1                                |                                   |                                    | Addgene #54653                                 |
| TagRFP              | 555             | 584           | 100,000 | 0.48 | 48         | 3.8 | 2.3                    |                                    | 1.9                               | 1.9                                | Addgene #31926                                 |
| mScarlet-I          | 569             | 593           | 104,000 | 0.54 | 56.16      | 5.4 | 3.1                    | 3.1                                | 2.9                               | 2.9                                | Addgene 85044                                  |
| mKate2              | 588             | 633           | 62,500  | 0.4  | 25         | 5.4 | 2.5                    | 2.4                                | 2.3                               | 2.3                                | Shcherbakova DM et al., 2018                   |
| mCherry             | 587             | 610           | 72,000  | 0.22 | 15.84      | 4.5 | 1.4                    | 1.5                                | 1.4                               | 1.4                                | Addgene #54563                                 |
| mRuby2              | 559             | 600           | 113,000 | 0.38 | 42.94      | 5.3 | 2.5                    | 2.2                                | 2.2                               | 2.2                                | Addgene #54768                                 |
| mCardinal           | 604             | 659           | 87,000  | 0.19 | 16.53      | 5.3 |                        | 1.8                                | 1.8                               | 1.8                                | Addgene #54799                                 |
| mMaroon             | 609             | 657           | 80,000  | 0.11 | 8.8        | 6.2 | N/A                    | 1                                  | 1                                 | 1                                  | Addgene #54554                                 |

**Supplementary Table 2.** Spectral properties for fluorescent fusion proteins tested previously.

| Fluorescent Protein | Excitation (nm) | Emission (nm) | EC      | QY   | Brightness | pKa | Lifetime (COS7 cells at 37 OC)<br>ns | Lifetime HEK293T ns (if<br>different) | Reference (Source)                              |
|---------------------|-----------------|---------------|---------|------|------------|-----|--------------------------------------|---------------------------------------|-------------------------------------------------|
| CCRS-mTQ2           | 434             | 474           | 30,000  | 0.93 | 27.9       | 3.1 | 4                                    | 4                                     | See Methods                                     |
| CXCR4-mTQ2          | 434             | 474           | 30,000  | 0.93 | 27.9       | 3.1 | 4                                    | 4                                     | See Methods                                     |
| Lifect-mTQ2         | 434             | 474           | 30,000  | 0.93 | 27.9       | 3.1 | 4.12                                 | 4.12                                  | Addgene #36201                                  |
| H2B-mTQ2            | 434             | 474           | 30,000  | 0.93 | 27.9       | 3.1 | 4.12                                 | 4.12                                  | Addgene #55557                                  |
| CD4-mTFP1           | 462             | 492           | 64,000  | 0.85 | 54.4       | 4.3 | 2.85                                 | 2.8                                   | See Methods                                     |
| H4-mTFP1            | 462             | 492           | 64,000  | 0.85 | 54.4       | 4.3 | 2.9                                  | 2.9                                   | Padilla-Parra et al., 2009 and<br>Addgene#55491 |
| CCRS-LSSmOrange     | 437             | 572           | 52,000  | 0.45 | 23.4       | 5.7 | 3.4                                  | 2.9                                   | Addgene #110194                                 |
| CXCR4-LSSmOrange    | 437             | 572           | 52,000  | 0.45 | 23.4       | 5.7 | 3.4                                  | 2.9                                   | Addgene #110197                                 |
| H2B-LSSmKate2       | 460             | 605           | 26,000  | 0.17 | 4.42       | 2.7 | 1.4                                  | 1.4                                   | Addgene #31903                                  |
| Mito-LSSmKate2      | 460             | 605           | 26,000  | 0.17 | 4.42       | 2.7 | 1.4                                  | 1.3                                   | Addgene #31879                                  |
| Mito-mCerulean      | 433             | 475           | 33,000  | 0.49 | 16.7       | N/A | 3                                    | 3                                     | Addgene #55384                                  |
| eGFP-Actin          | 488             | 507           | 55,900  | 0.6  | 33.54      | 6   | 2.7                                  | 2.7                                   | Addgene #58149                                  |
| eGFP-microtubules   | 488             | 507           | 55,900  | 0.6  | 33.54      | 6   | 2.6                                  | 2.6                                   | Addgene #24327                                  |
| Lifect-eGFP         | 488             | 507           | 55,900  | 0.6  | 33.54      | 6   | 2.58                                 | 2.6                                   | Addgene #58470                                  |
| GPI-eGFP            | 488             | 507           | 55,900  | 0.6  | 33.54      | 6   | 2.6                                  | 2.6                                   | Addgene #182866                                 |
| EMTB-eGFP           | 488             | 507           | 55,900  | 0.6  | 33.54      | 6   | 2.6                                  | 2.6                                   | Addgene #26741                                  |
| NowGFP-CD3Z         | 494             | 502           | 56,700  | 0.76 | 43.09      | 6.2 | 4                                    | 4                                     | See Methods                                     |
| GFPopt-HXB2         | 488             | 507           | 55,900  | 0.6  | 33.54      | 6   | 2.2                                  | 2.35                                  | Nakane et al., 2015 (JBC)                       |
| LaminB-Wassabi      | 493             | 509           | 70,000  | 0.8  | 56         | 6.5 | 3.1                                  | 3.1                                   | Addgene #56507                                  |
| mHoneyDew-CD3Z      | 487             | 562           | 17,000  | 0.12 | 2.04       | 4   | 1.8                                  | 1.8                                   | See Methods                                     |
| Actin-mScarlet      | 569             | 594           | 100,000 | 0.7  | 70         | 5.3 | 3.4                                  | 3.4                                   | Addgene #85056                                  |
| Lifect-mScarlet     | 569             | 594           | 100,000 | 0.7  | 70         | 5.3 | 3.55                                 | 3.15                                  | Addgene #85054                                  |
| Lifect-mRuby2       | 559             | 600           | 113,000 | 0.38 | 42.94      | 5.3 | 2.2                                  | 2.2                                   | Addgene #54560                                  |
| Lifect-TagRFP       | 555             | 584           | 100,000 | 0.48 | 48         | 3.8 | 1.9                                  | 1.9                                   | Addgene #54586                                  |
| MitoTagRFP          | 555             | 584           | 100,000 | 0.48 | 48         | 3.8 | 1.9                                  | 1.9                                   | Addgene #58023                                  |
| LifeAct-mCherry     | 587             | 610           | 72,000  | 0.22 | 15.84      | 4.5 | 1.5                                  | 1.45                                  | Addgene #54491                                  |
| Gag-mCherry         | 587             | 610           | 72,000  | 0.22 | 15.84      | 4.5 | 1.5                                  | 1.2                                   | Padilla-Parra et al., 2013                      |
| β-Actin-mCherry     | 587             | 610           | 72,000  | 0.22 | 15.84      | 4.5 | 1.4                                  | 1.4                                   | Addgene #31949                                  |
| Golgi-TdTomato      | 554             | 581           | 138,000 | 0.69 | 95.22      | 4.7 | 1.9                                  | 1.9                                   | Addgene #58100                                  |
| ER-TdTomato         | 554             | 581           | 138,000 | 0.69 | 95.22      | 4.7 | 1.8                                  | 1.8                                   | Addgene #58097                                  |

**Supplementary Table 3.** Spectral bleedthrough for all channels corresponding to Figure4. Blue cells (below 4% crosstalk), green cells (4-15% crosstalk), yellow cells (15-40% crosstalk) and red cells (40-100%).

| Pattern /<br>Dye | Ametrine | eGFP  | LSSmK2 | LSSmOr | mCherry | mKate2 | mTFP1 | mTQ2  | mWasabi |
|------------------|----------|-------|--------|--------|---------|--------|-------|-------|---------|
| <b>Ametrine</b>  | 100.0    | 1.6   | 0.4    | 2.5    | 0.7     | 6.2    | 2.7   | 26.9  | 8.5     |
| <b>eGFP</b>      | 1.4      | 100.0 | 1.4    | 4.9    | 1.3     | 26.5   | 7.6   | 5.5   | 1.8     |
| <b>LSSmK2</b>    | 0.1      | 0.3   | 100.0  | 0.1    | 0.0     | 5.2    | 0.0   | 1.2   | 0.0     |
| <b>LSSmOr</b>    | 1.5      | 2.8   | 0.7    | 100.0  | 94.3    | 1.9    | 85.1  | 0.2   | 0.0     |
| <b>mCherry</b>   | 0.6      | 1.2   | 0.0    | 57.0   | 100.0   | 2.5    | 22.8  | 0.3   | 0.0     |
| <b>mKate2</b>    | 9.9      | 90.1  | 57.2   | 6.1    | 12.2    | 100.0  | 1.6   | 47.4  | 0.6     |
| <b>mTFP1</b>     | 1.3      | 2.4   | 0.0    | 62.1   | 17.5    | 0.5    | 100.0 | 0.2   | 13.2    |
| <b>mTQ2</b>      | 32.1     | 12.2  | 9.7    | 0.2    | 0.3     | 41.7   | 0.4   | 100.0 | 0.3     |
| <b>mWasabi</b>   | 3.8      | 0.8   | 0.0    | 0.0    | 0.0     | 0.1    | 5.3   | 0.3   | 100.0   |

## Supplementary Note 1

The ImageJ macro utilized to recover the fraction for each solution/analyte in a two species system is given below:

// Introduce the known lifetimes for species A and B. The macro will calculate the proportion for the shortest lifetime species.

```
TauA = ;
```

```
TauB = ;
```

```
newImage("1", "32-bit black", 512, 512, 1);
```

```
run("Add...", "value=TauB");
```

```
rename("TauB-Image");
```

```
newImage("1", "32-bit black", 512, 512, 1);
```

```
run("Add...", "value=TauA");
```

```
rename("TauA-Image");
```

// Calculates the numerator

```
newImage("1", "32-bit black", 512, 512, 1);
```

```
run("Add...", "value=1");
```

```
rename("one");
```

```
imageCalculator("Divide create 32-bit", "tau", "TauA-Image");
```

```
selectWindow("Result of tau");
```

```
rename("Tau/TauA");
```

```
imageCalculator("Subtract create", "one", "Tau/TauA");
```

```
selectWindow("Result of one");
```

```
rename("Numerator");
```

```
close("one")
```

//Produces and image  $\text{TauB}/\text{TauA}$  and  $(\text{TauB}/\text{TauA})^{\text{sqr}}$

```
imageCalculator("Divide create 32-bit", "TauB-Image", "TauA-Image");
```

```
selectWindow("Result of TauB-Image");
```

```
rename("TauB/TauA image");
```

```
imageCalculator("Multiply create 32-bit", "TauB/TauA image", "TauB/TauA image");
```

```
selectWindow("Result of TauB/TauA image");
```

```
rename("Square TauB/TauA image");
```

```
imageCalculator("Multiply create 32-bit", "Tau/TauA", "TauB/TauA image");
```

```
selectWindow("Result of Tau/TauA");
```

```
rename("product");
```

//Calculates denominator

```
selectWindow("Numerator");
imageCalculator("Subtract create 32-bit", "Numerator", "Square TauB/TauA image");
selectWindow("Result of Numerator");
rename("second product");
```

```
imageCalculator("Add create 32-bit", "second product", "product");
selectWindow("Result of second product");
rename("denominator");
```

```
//Calculates fB
```

```
imageCalculator("Divide create 32-bit", "Numerator", "denominator");
selectWindow("Result of Numerator");
rename("fB");
```

```
//Closes windows
```

```
selectWindow("denominator");
close();
selectWindow("second product");
close();
selectWindow("Numerator");
close();
selectWindow("product");
close();
selectWindow("Square TauB/TauA image");
close();
selectWindow("TauB/TauA image");
close();
selectWindow("Tau/TauA");
close();
selectWindow("TauA-Image");
close();
selectWindow("TauB-Image");
close();
```
